# Supplementary material
Source: PubMed Central journal article supplement (PMC5801056)
Supplement: NIHMS921959-supplement-1.pdf [file NIHMS921959-supplement-1.pdf]

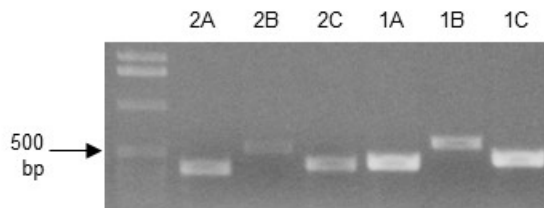

**Figure 1.** cDNAs encoding human IGF-I prepropeptides (1A, 1B, 1C, 2A, 2B and 2C) generated by reverse transcription and PCR using the primers in Table 1. Human articular chondrocytes were isolated from de-identified articular cartilage discarded at the time of total knee arthroplasty. Chondrocytes were placed in monolayer culture in DMEM with 10% FBS, 100 U/ml penicillin, 100 µg/ml streptomycin, 2 mM glutamine and 50 µg/ml ascorbic acid. On day 3 of the culture, medium was changed. On day 5 medium was removed and chondrocytes were harvested in RLT lysis buffer for total RNA preparation using the RNeasy Mini kit (Qiagen). Total RNA was reverse-transcribed using the High-capacity cDNA Archive Kit (Applied Biosystems, Foster City, CA). Shown is the ethidium bromide staining of the cDNAs following agarose gel electrophoresis.
