# Supplementary material
Source: PubMed Central journal article supplement (PMC5801056)
Supplement: NIHMS921959-supplement-2.pdf [file NIHMS921959-supplement-2.pdf]

**STable 1.** Comparison of IGF-I production and heparin binding activity between human IGF-I isoforms (1A, 1B, 1C, 2A, 2B and 2C)

|                          | Comparison |     |         | p value | Result  |
|--------------------------|------------|-----|---------|---------|---------|
| IGF-I production         | 1A         | vs. | 1B      | 0.001   | 1A > 1B |
|                          | 1A         | vs. | 1C      | 0.026   | 1A > 1C |
|                          | 1A         | vs. | 2A      | 0.104   | n.s.    |
|                          | 1A         | vs. | 2B      | 0.001   | 1A > 2B |
|                          | 1A         | vs. | 2C      | 0.379   | n.s.    |
|                          | 1B         | vs. | 1C      | 0.001   | 1B < 1C |
|                          | 1B         | vs. | 2A      | < 0.001 | 1B < 2A |
|                          | 1B         | vs. | 2B      | 0.021   | 1B < 2B |
|                          | 1B         | vs. | 2C      | 0.001   | 1B < 2C |
|                          | 1C         | vs. | 2A      | 0.005   | 1C < 2A |
|                          | 1C         | vs. | 2B      | 0.003   | 1C > 2B |
|                          | 1C         | vs. | 2C      | 0.08    | n.s.    |
| Heparin binding activity | 2A         | vs. | 2B      | < 0.001 | 2A > 2B |
|                          | 2A         | vs. | 2C      | 0.01    | 2A > 2C |
|                          | 2B         | vs. | 2C      | 0.001   | 2B < 2C |
|                          | 1A         | vs. | 1B      | < 0.001 | 1A > 1B |
|                          | 1A         | vs. | 1C      | < 0.001 | 1A > 1C |
|                          | 1A         | vs. | 2A      | 0.067   | n.s.    |
|                          | 1A         | vs. | 2B      | < 0.001 | 1A > 2B |
|                          | 1A         | vs. | 2C      | < 0.001 | 1A > 2C |
|                          | 1B         | vs. | 1C      | < 0.001 | 1B < 1C |
|                          | 1B         | vs. | 2A      | < 0.001 | 1B < 2A |
|                          | 1B         | vs. | 2B      | 1       | n.s.    |
|                          | 1B         | vs. | 2C      | < 0.001 | 1B < 2C |
| 1C                       | vs.        | 2A  | < 0.001 | 1C < 2A |         |
| 1C                       | vs.        | 2B  | < 0.001 | 1C > 2B |         |
| 1C                       | vs.        | 2C  | 0.066   | n.s.    |         |
| 2A                       | vs.        | 2B  | < 0.001 | 2A > 2B |         |
| 2A                       | vs.        | 2C  | < 0.001 | 2A > 2C |         |
| 2B                       | vs.        | 2C  | < 0.001 | 2B < 2C |         |

n.s.: no significant difference.

**STable 2.** Comparison of IGF-I production and heparin binding activity between human IGF-I 1A and its truncated mutants (1A-noEA and 1A-noEx6)

|                          | Comparison |     |          | p value | Result             |
|--------------------------|------------|-----|----------|---------|--------------------|
| IGF-I production         | 1A         | vs. | 1A-noEA  | < 0.001 | 1A > 1A-noEA       |
|                          | 1A         | vs. | 1A-noEx6 | 0.078   | n.s.               |
|                          | 1A-noEA    | vs. | 1A-noEx6 | 0.002   | 1A-noEA < 1A-noEx6 |
| Heparin binding activity | 1A         | vs. | 1A-noEA  | < 0.001 | 1A > 1A-noEA       |
|                          | 1A         | vs. | 1A-noEx6 | < 0.001 | 1A > 1A-noEx6      |
|                          | 1A-noEA    | vs. | 1A-noEx6 | < 0.001 | 1A-noEA < 1A-noEx6 |

n.s.: no significant difference.

**STable 3.** Comparison of IGF-I production and heparin binding activity between human IGF-I 1A and its mutants (1A-N92A and 1A-noEA)

|                          | Comparison |     |         | p value | Result            |
|--------------------------|------------|-----|---------|---------|-------------------|
| IGF-I production         | 1A         | vs. | 1A-N92A | 0.291   | n.s.              |
|                          | 1A         | vs. | 1A-noEA | 0.003   | 1A > 1A-noEA      |
|                          | 1A-N92A    | vs. | 1A-noEA | 0.002   | 1A-N92A > 1A-noEA |
| Heparin binding activity | 1A         | vs. | 1A-N92A | < 0.001 | 1A > 1A-N92A      |
|                          | 1A         | vs. | 1A-noEA | < 0.001 | 1A > 1A-noEA      |
|                          | 1A-N92A    | vs. | 1A-noEA | 0.001   | 1A > 1A-noEA      |

n.s.: no significant difference.

**STable 4.** Comparison of IGF-I production, GAG production and DNA content between human IGF-I 1A and its mutants (1A-noEA, 1A-R/A and 1A-R/K)

|                              | Comparison |     |         | p value | Result            |
|------------------------------|------------|-----|---------|---------|-------------------|
|                              |            | vs. |         |         |                   |
| IGF-I production             | 1A         | vs. | 1A-noEA | 0.005   | 1A > 1A-noEA      |
|                              | 1A         | vs. | 1A-R/A  | 0.008   | 1A < 1A-R/A       |
|                              | 1A         | vs. | 1A-R/K  | 0.001   | 1A > 1A-R/K       |
|                              | 1A-noEA    | vs. | 1A-R/A  | 0.001   | 1A-noEA < 1A-R/A  |
|                              | 1A-noEA    | vs. | 1A-R/K  | 0.301   | n.s.              |
|                              | 1A-R/A     | vs. | 1A-R/K  | 0.001   | 1A-R/A > 1A-R/K   |
| GAG production in medium     | Control    | vs. | 1A      | 0.001   | Control < 1A      |
|                              | Control    | vs. | 1A-noEA | 0.002   | Control < 1A-noEA |
|                              | Control    | vs. | 1A-R/A  | < 0.001 | Control < 1A-R/A  |
|                              | Control    | vs. | 1A-R/K  | 0.003   | Control < 1A-R/K  |
|                              | 1A         | vs. | 1A-noEA | 0.262   | n.s.              |
|                              | 1A         | vs. | 1A-R/A  | 0.09    | n.s.              |
|                              | 1A         | vs. | 1A-R/K  | 0.392   | n.s.              |
|                              | 1A-noEA    | vs. | 1A-R/A  | 0.024   | 1A-noEA < 1A-R/A  |
|                              | 1A-noEA    | vs. | 1A-R/K  | 0.0867  | n.s.              |
|                              | 1A-R/A     | vs. | 1A-R/K  | 0.047   | 1A-R/A > 1A-R/K   |
| GAG production in cell layer | Control    | vs. | 1A      | < 0.001 | Control < 1A      |
|                              | Control    | vs. | 1A-noEA | < 0.001 | Control < 1A-noEA |
|                              | Control    | vs. | 1A-R/A  | < 0.001 | Control < 1A-R/A  |
|                              | Control    | vs. | 1A-R/K  | < 0.001 | Control < 1A-R/K  |
|                              | 1A         | vs. | 1A-noEA | 0.002   | 1A > 1A-noEA      |
|                              | 1A         | vs. | 1A-R/A  | 0.013   | 1A < 1A-R/A       |
|                              | 1A         | vs. | 1A-R/K  | 0.013   | 1A > 1A-R/K       |
|                              | 1A-noEA    | vs. | 1A-R/A  | 0.001   | 1A-noEA < 1A-R/A  |
|                              | 1A-noEA    | vs. | 1A-R/K  | 0.371   | n.s.              |
|                              | 1A-R/A     | vs. | 1A-R/K  | 0.004   | 1A-R/A > 1A-R/K   |
| DNA content in cell layer    | Control    | vs. | 1A      | < 0.001 | Control < 1A      |
|                              | Control    | vs. | 1A-noEA | < 0.001 | Control < 1A-noEA |
|                              | Control    | vs. | 1A-R/A  | < 0.001 | Control < 1A-R/A  |
|                              | Control    | vs. | 1A-R/K  | < 0.001 | Control < 1A-R/K  |
|                              | 1A         | vs. | 1A-noEA | 0.085   | n.s.              |
|                              | 1A         | vs. | 1A-R/A  | 0.286   | n.s.              |
|                              | 1A         | vs. | 1A-R/K  | 0.322   | n.s.              |
|                              | 1A-noEA    | vs. | 1A-R/A  | 0.03    | 1A-noEA < 1A-R/A  |
|                              | 1A-noEA    | vs. | 1A-R/K  | 0.338   | n.s.              |
|                              | 1A-R/A     | vs. | 1A-R/K  | 0.089   | n.s.              |

n.s.: no significant difference.
